# Supplementary material
Source: publisher site journal article supplement (https://www.spandidos-publications.com/9/downloadSupplementary)
Supplement: Supplementary file 1 [file downloadSupplementary]

Table SI. Demographic and clinical features of patients with NMO and healthy control subjects.

| Characteristics                               | Patient with<br>NMO | Health<br>Control | P-value |
|-----------------------------------------------|---------------------|-------------------|---------|
| Sex, female/male                              | 5/0                 | 5/0               | NS      |
| Age (years)                                   | 52.9±10.3           | 49±12.5           | NS      |
| Disease Duration (years)                      | 6.0±5.0             | -                 | -       |
| Number of segments of spinal cord<br>involved | 7 (3-18)            | -                 | -       |
| Expanded disability status scale score        | 5 (2.0-8.5)         | -                 | -       |
| BMI (kg/m <sup>2</sup> )                      | 23.2±2.0            | 23.1±1.8          | NS      |

Data are expressed as the mean ± standard deviation unless otherwise indicated; NMO, neuromyelitis optica; BMI, body mass index; NS, not significant.
